# Supplementary material for: Isolation and Characterization of a New Endophytic Actinobacterium Streptomyces californicus Strain ADR1 as a Promising Source of Anti-Bacterial, Anti-Biofilm and Antioxidant Metabolites
Source: PubMed Central journal article supplement (PMC7355773; doi:10.3390/microorganisms8060929), 2020-06-19
Supplement: microorganisms-08-00929-s001.pdf [file microorganisms-08-00929-s001.pdf]

Figure S1.

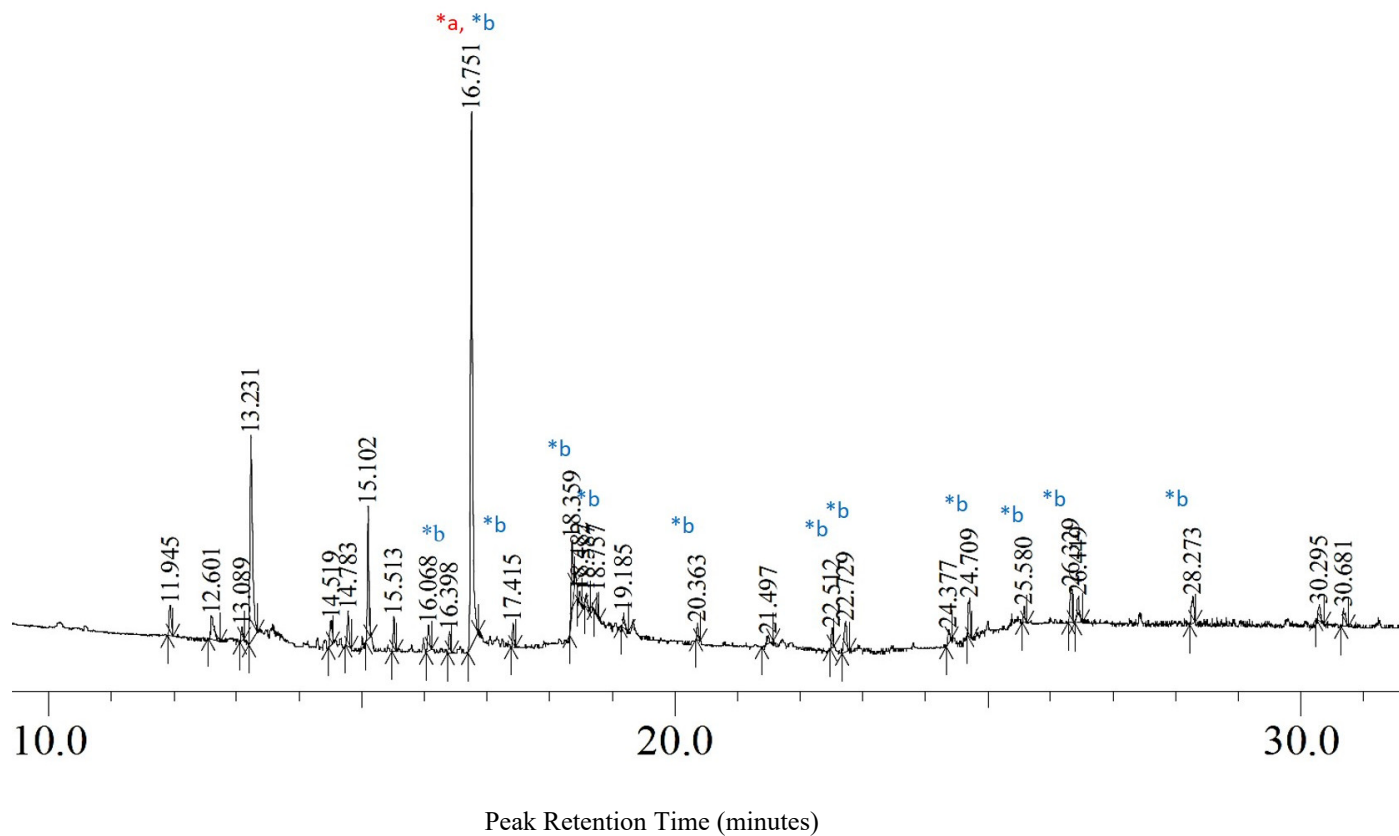

**Figure S1. GC-MS Chromatogram of ADR1 metabolites.** The specific peaks have been identified by the RT. No peaks were observed after 31 minutes.

\* a. Solvent specific peaks, \* b. Production medium specific peaks

**Table S1. Compounds detected in the ADR1 metabolites extract by GC-MS analysis using NIST & Wiley library as reference**

| S. No. | RT     | SI | Reference Compounds from Library                                        |
|--------|--------|----|-------------------------------------------------------------------------|
| 1.     | 11.945 | 88 | Methanoazulen-9-ol, decahydro-2,2,4,8-tetramethyl-stereoisomer          |
| 2.     | 12.601 | 78 | 2-[(Trimethylsilyl)oxy] propan-1-ol                                     |
| 3.     | 13.089 | 96 | Naphtho [2,3-g]-1,6,2,5-dioxasilaborocin                                |
| 4.     | 13.231 | 84 | 2-[(trimethylsilyl)oxy]-4-methoxyacetophenone                           |
| 5.     | 14.519 | 90 | 5-z-methyl-2-z-hydroxycarbonyl-5-e-ethenyl-4-z-propen-2-ylcyclohexanone |
| 6.     | 14.783 | 75 | trimethylsilyl ester of tetradecanoic acid                              |
| 7.     | 15.102 | 92 | Diisobutyl phthalate                                                    |
| 8.     | 15.513 | 76 | n-Pentadecanoic acid                                                    |
| 9.     | 16.068 | 88 | 2-pyridineethanamine, n-methyl-n-[2-(4-pyridinyl) ethyl]                |
| 10.    | 18.483 | 72 | Methoxyacetic acid, 2-ethylhexyl ester                                  |
| 11.    | 18.483 | 73 | 3,3-Dimethyl-2-pentanol                                                 |
| 12.    | 18.587 | 73 | 4-Phenylbutan-2-ol, trimethylsilyl ether                                |
| 13.    | 18.680 | 65 | Cyclohexylundecyl ester of Oxalic acid                                  |
| 14.    | 19.185 | 71 | 4-Ethyl-2-octanol                                                       |
| 15.    | 21.497 | 72 | Methyl 2-butynoate                                                      |
| 16.    | 24.377 | 71 | 4-(4'-methylphenyl)-4-pentenal                                          |
| 17.    | 26.329 | 79 | 6,7-epoxy-3,7,11-trimethyldodeca-1,3,10-triene                          |
| 18.    | 26.449 | 79 | 2-(2-methylidenecyclopropyl) propan-2-yl (E)-but-2-enoate               |
| 19.    | 30.295 | NA | No hits found                                                           |
| 20.    | 30.681 | 63 | Trimethylsilyl ester of 2,6-dihydroxybenzoic acid                       |
